# Supplementary material for: Signatures of defective DNA repair and replication in early-onset renal cancer patients referred for germline genetic testing
Source: bioRxiv or medRxiv preprint supplement (doi:10.1101/2022.05.23.22275227), 2022-05-25
Supplement: Supplementary file [file media-3.pdf]

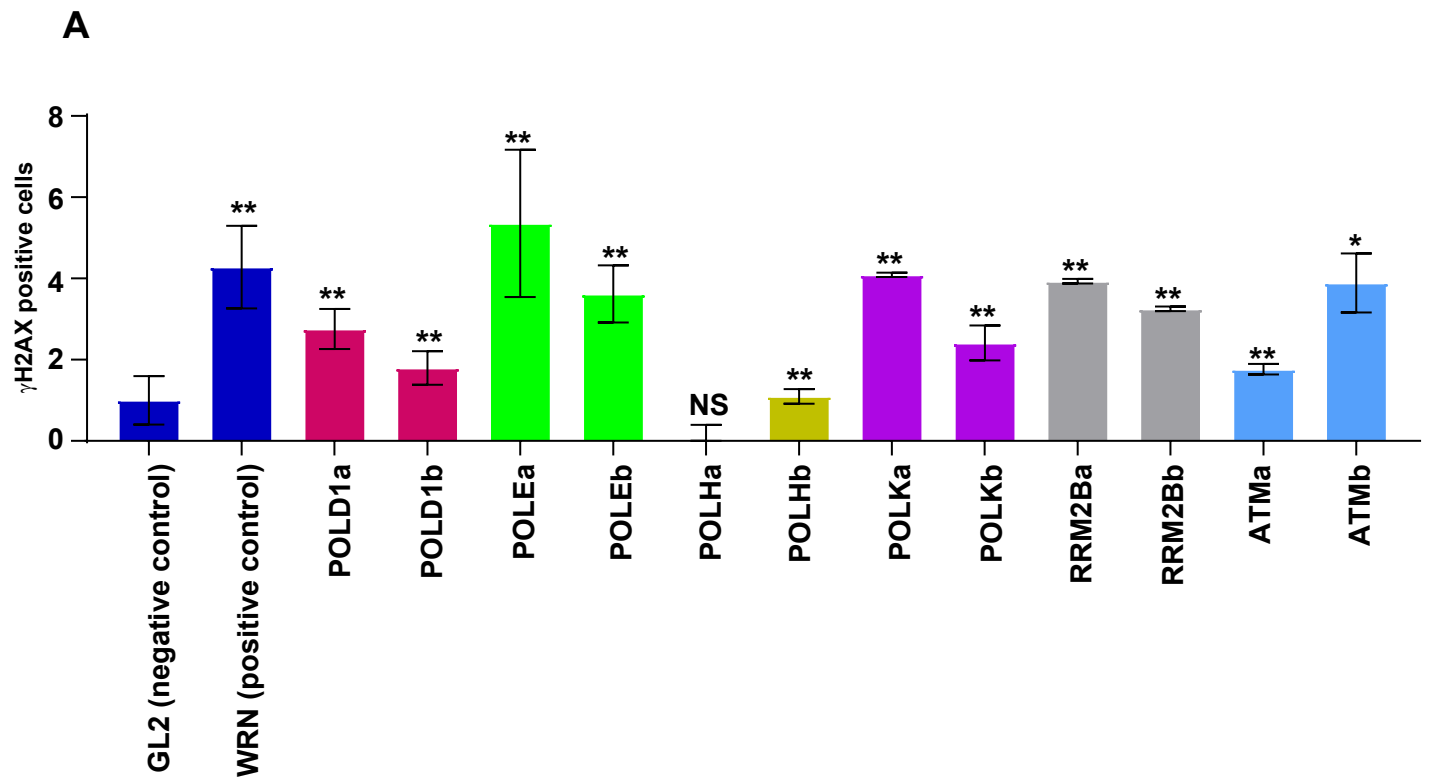

Demidova et al., Supplementary Figure 2
