# Supplementary material for: Signatures of defective DNA repair and replication in early-onset renal cancer patients referred for germline genetic testing
Source: bioRxiv or medRxiv preprint supplement (doi:10.1101/2022.05.23.22275227), 2022-05-25
Supplement: Supplementary file [file media-7.pdf]

**Supplementary Table 3. Complete summary of results for the DNA polymerase variants identified in the eoRCC patients.**

| Gene                                     | <i>POLD1</i>                                                                                                  | <i>POLH</i>                                                                | <i>POLE</i>                                       | <i>POLK</i>                                                                        |
|------------------------------------------|---------------------------------------------------------------------------------------------------------------|----------------------------------------------------------------------------|---------------------------------------------------|------------------------------------------------------------------------------------|
| Variant                                  | V759I                                                                                                         | G209V                                                                      | W1624X                                            | E29K                                                                               |
| $\gamma$ H2AX in patient primary PBMCs   | increased                                                                                                     |                                                                            | increased                                         | increased                                                                          |
| $\gamma$ H2AX on knockdown in Caki cells | decreased                                                                                                     | decreased                                                                  | decreased                                         | decreased                                                                          |
| Protein expression in EBV-cell lines     | no difference                                                                                                 | decreased                                                                  | no difference                                     | no difference                                                                      |
| Cell counts in EBV-cell lines            | no difference                                                                                                 |                                                                            | no difference                                     | no difference                                                                      |
| CTB viability in EBV-cell lines          | increased viability                                                                                           |                                                                            | increased viability                               | increased viability                                                                |
| DNA fiber assay in EBV-cell lines        | slower replication speed, slower fork restoration                                                             |                                                                            | slower replication speed, slower fork restoration | no difference in replication                                                       |
| Cell cycle in EBV-cell lines             | no difference                                                                                                 |                                                                            | no difference                                     | no difference                                                                      |
| Tumor sequencing (LOH)                   | no LOH                                                                                                        | no LOH                                                                     | no LOH                                            | no LOH                                                                             |
| TMB analysis                             | 12.85 mut/Mb                                                                                                  |                                                                            | 14.44 mut/Mb                                      | -                                                                                  |
| Structural modeling                      | may disrupt D757 residue that coordinates Mg <sup>2+</sup> ions in the active center of the polymerase domain | may alter stability of the $\alpha$ -helix in the polymerase active center | N/A (stop gain variant)                           | -                                                                                  |
| Biochemical assays                       | less robust polymerase activity, impaired function versus wild type complex                                   | slower lesion bypass, suggestive of better processivity over wild type     | Same as above                                     | see below                                                                          |
| Biochemical assays previously reported   | -                                                                                                             | -                                                                          | -                                                 | reduced catalytic efficiency and reduced replication fidelity versus wild type(20) |

CTB – cell titer blue; DDR – DNA damage and repair; eoRCC – early-onset renal cell carcinoma; LOH – loss of heterozygosity; NS – non-significant; PBMCs – peripheral blood monocytes; TMB – tumor mutation burden
